# Supplementary material for: Spectroscopic Identification of Neurotoxin Tetramethylenedisulfotetramine (TETS) Captured by Supramolecular Receptor β‐Cyclodextrin Immobilized on Nanostructured Gold Surfaces
Source: Hindawi journal article supplement (doi:10.1155/2014/207258), 2014-01-01
Supplement: f1 [file 207258.f1.pdf]

## Electronic Supplementary Information

### **Spectroscopic identification of neurotoxin Tetramethylenedisulfotetramine (TETS) captured by supramolecular receptor $\beta$ -cyclodextrin immobilized on nano-structured gold surfaces**

*H. Dernaika\*, S. V. Chong, C. G. Artur and J. L. Tallon*

*\*E-mail: haissamdern@gmail.com*

**Figure S1**

Raman spectra of  $\beta$ -CD (bottom curve) and  $\beta$ -CD-SH (top curve)

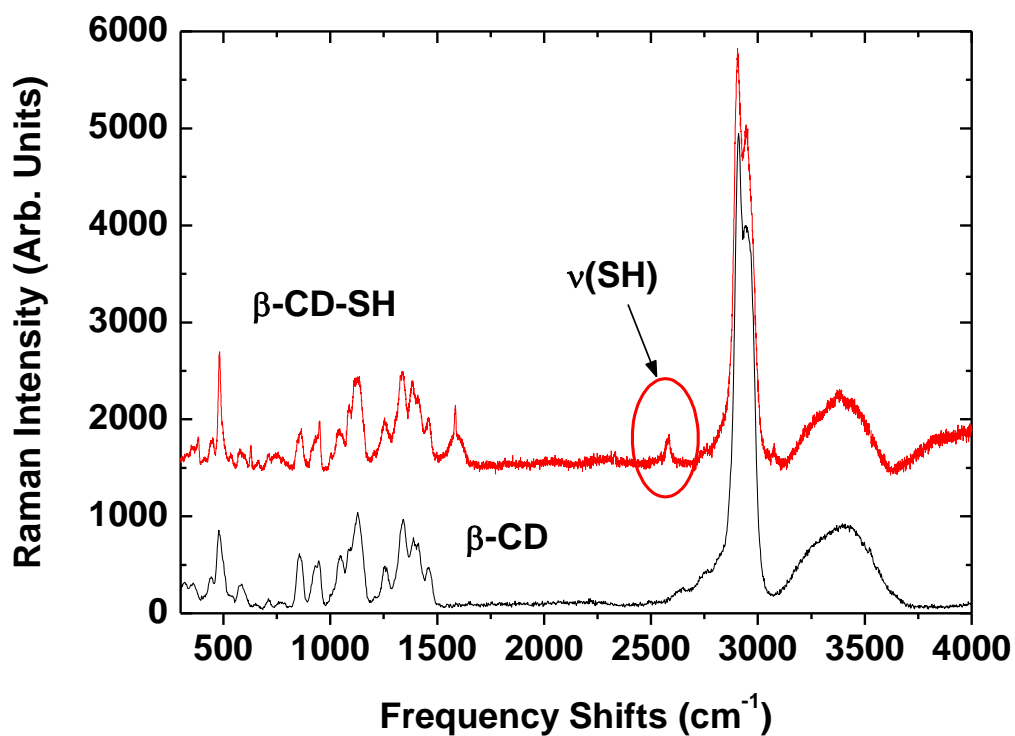

**Figure S2**

SEM photomicrographs of immobilized 10 nm gold nanoparticles on a flat gold surface

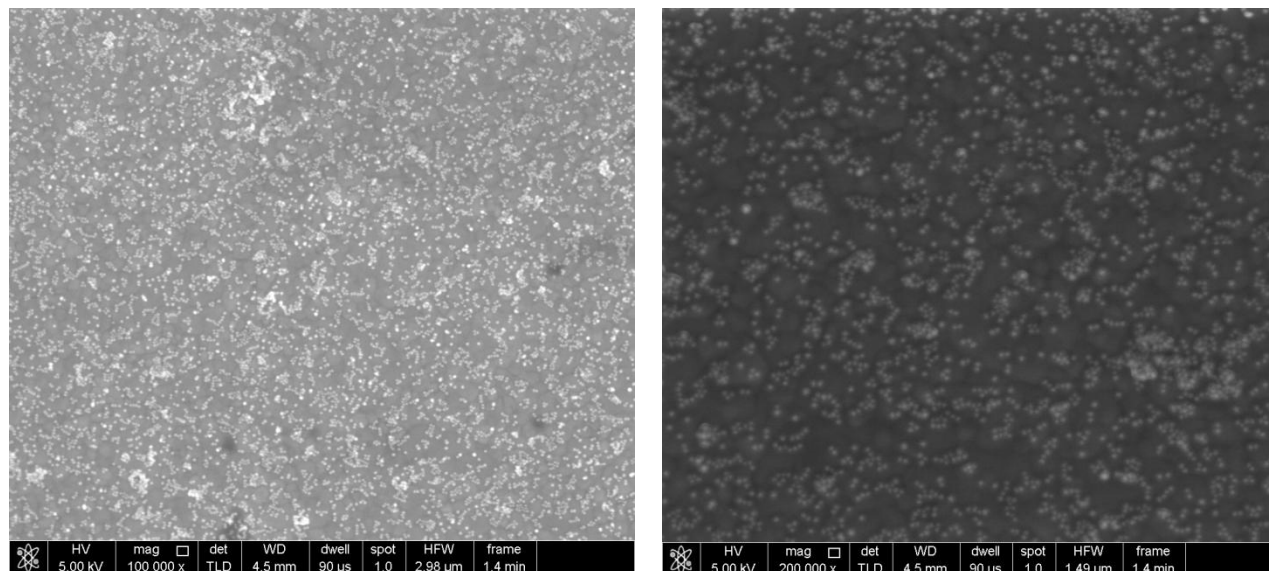**Figure S3**

SEM photomicrographs of Klarite<sup>®</sup>

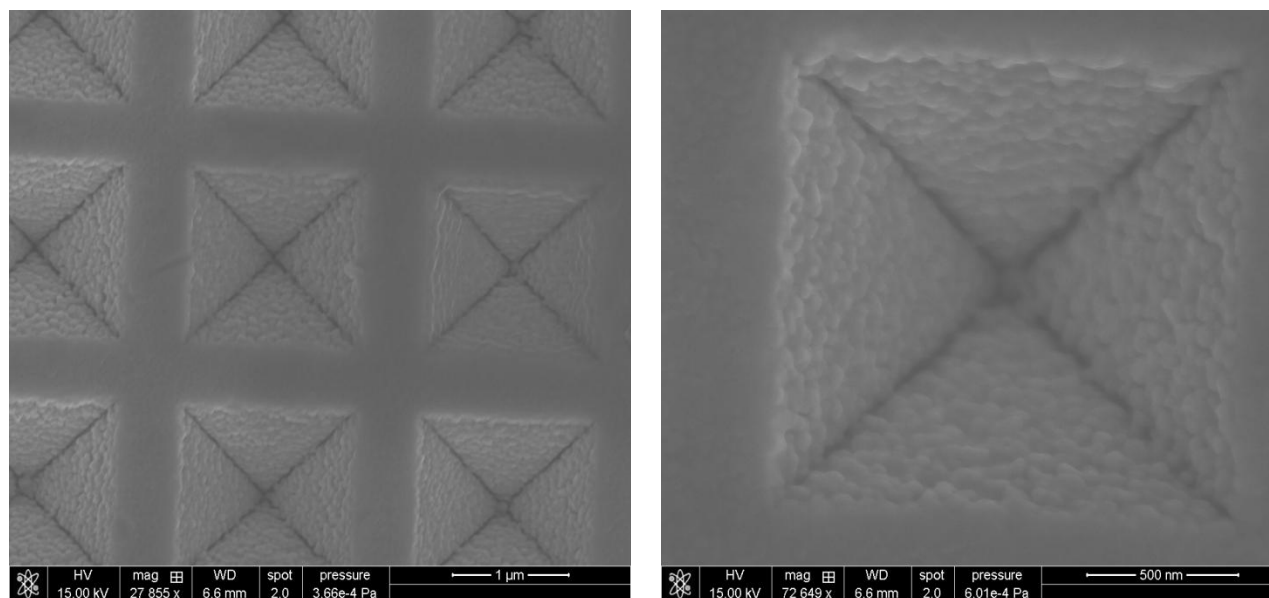

**Figure S4**

Core-level XPS S 2p spectrum from unbound thiolated CD powder (bottom) confirming the presence of unbound CD on the Au surfaces in Figure 3b

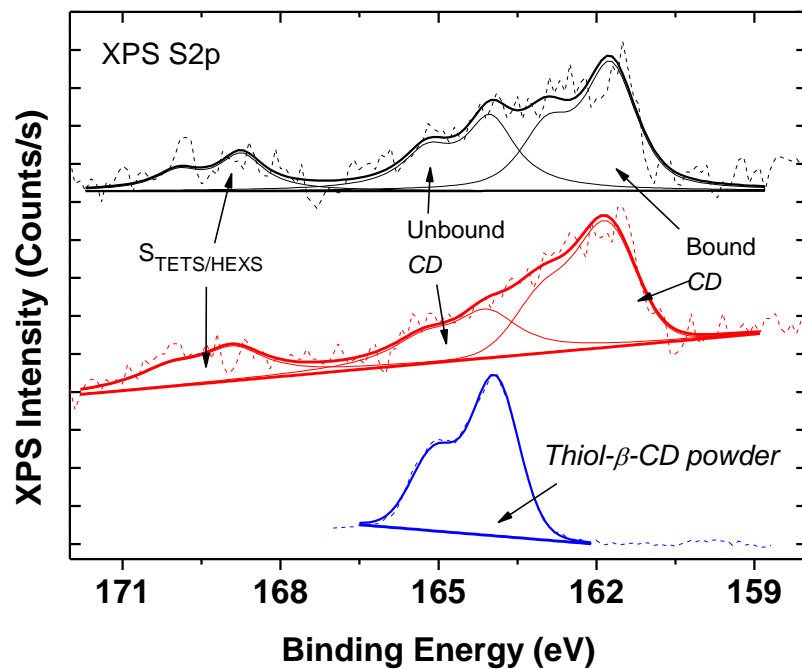**Figure S5**

X-ray diffraction of Klarite® SERS-active surface

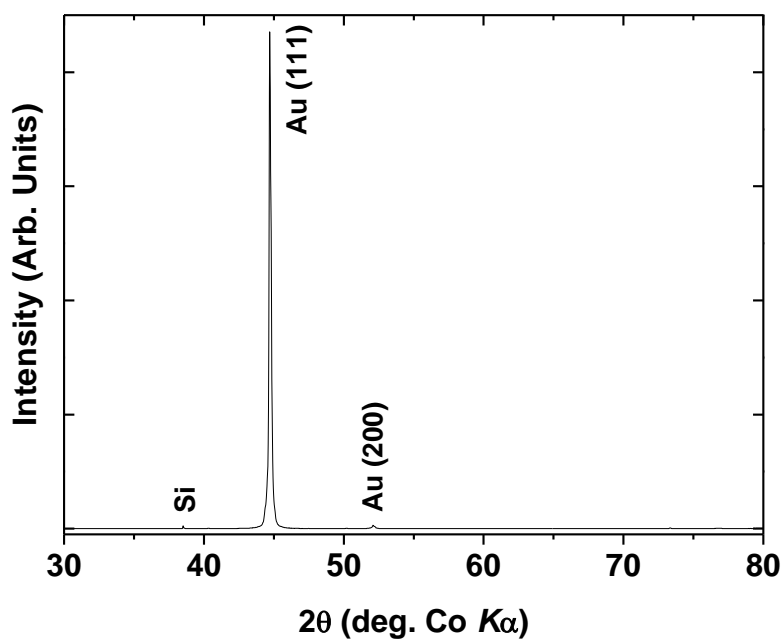

**Table S1** TETS harmonics calculated using DFT at the B3LYP level of theory

| TETS Harmonics<br>(cm <sup>-1</sup> ) | IR Intensities<br>(Km/mol) | Raman scattering activity<br>(Å <sup>4</sup> /AMU) | Raman cross<br>section (cm <sup>2</sup> /sr) |
|---------------------------------------|----------------------------|----------------------------------------------------|----------------------------------------------|
| 171.2402                              | 6.3922                     | 0.4287                                             | 1.51261E-31                                  |
| 171.3182                              | 6.3904                     | 0.4294                                             | 1.51392E-31                                  |
| 236.3095                              | 2E-4                       | 0.4463                                             | 9.30444E-32                                  |
| 253.1293                              | 1E-4                       | 7.0733                                             | 1.3232E-30                                   |
| 286.3075                              | 1E-4                       | 4E-4                                               | 6.18546E-35                                  |
| 361.9262                              | 0.1934                     | 0.0058                                             | 6.32712E-34                                  |
| 363.6816                              | 0.2087                     | 0.0052                                             | 5.63292E-34                                  |
| 402.4852                              | 15.2737                    | 8E-4                                               | 7.49355E-35                                  |
| 414.937                               | 0.0313                     | 0.0143                                             | 1.283E-33                                    |
| 437.3952                              | 1.4306                     | 0.9513                                             | 7.92741E-32                                  |
| 437.7644                              | 1.3421                     | 0.9353                                             | 7.78492E-32                                  |
| 471.9981                              | 0.0021                     | 6.8805                                             | 5.1607E-31                                   |
| 482.6858                              | 3.204                      | 2.1464                                             | 1.56129E-31                                  |
| 484.2386                              | 2.8837                     | 5.5187                                             | 3.99672E-31                                  |
| 484.9362                              | 2.8274                     | 5.196                                              | 3.75563E-31                                  |
| 512.1539                              | 3E-4                       | 3.5655                                             | 2.3929E-31                                   |
| 572.9386                              | 70.0816                    | 3.1465                                             | 1.81734E-31                                  |
| 630.4217                              | 76.7958                    | 0.0881                                             | 4.48614E-33                                  |
| 638.7867                              | 0.0293                     | 49.4963                                            | 2.4773E-30                                   |
| 647.4006                              | 6.4156                     | 1.9976                                             | 9.82456E-32                                  |
| 648.8486                              | 5.314                      | 2.004                                              | 9.82733E-32                                  |
| 692.7846                              | 126.9108                   | 0.06                                               | 2.70184E-33                                  |
| 697.1421                              | 128.6914                   | 0.0793                                             | 3.542E-33                                    |
| 839.8969                              | 59.362                     | 1.3534                                             | 4.75219E-32                                  |
| 841.5839                              | 2.4657                     | 0.8618                                             | 3.01821E-32                                  |
| 843.0371                              | 21.0388                    | 1.0829                                             | 3.78412E-32                                  |
| 844.1313                              | 290.2046                   | 3.3742                                             | 1.17712E-31                                  |
| 899.8002                              | 0.0093                     | 5E-4                                               | 1.60617E-35                                  |
| 948.4512                              | 0.021                      | 4.7858                                             | 1.43596E-31                                  |
| 1008.9813                             | 91.7887                    | 1.4147                                             | 3.91616E-32                                  |
| 1010.4879                             | 90.9382                    | 1.4149                                             | 3.90909E-32                                  |
| 1049.1935                             | 0.005                      | 0.0042                                             | 1.10462E-34                                  |
| 1078.179                              | 0.0115                     | 4E-4                                               | 1.01496E-35                                  |
| 1132.7972                             | 424.7334                   | 3.378                                              | 8.02859E-32                                  |
| 1148.6909                             | 0.133                      | 21.2363                                            | 4.95455E-31                                  |
| 1153.9005                             | 53.0678                    | 0.0136                                             | 3.15387E-34                                  |
| 1155.0388                             | 54.0878                    | 0.0373                                             | 8.63858E-34                                  |
| 1206.7517                             | 59.4112                    | 0.3076                                             | 6.71789E-33                                  |
| 1271.7341                             | 0.008                      | 3.2764                                             | 6.66515E-32                                  |
| 1326.3896                             | 3.9098                     | 0.2565                                             | 4.92594E-33                                  |
| 1328.5137                             | 4.7417                     | 0.2138                                             | 4.09688E-33                                  |
| 1352.5991                             | 159.8771                   | 6.0937                                             | 1.1391E-31                                   |
| 1352.9361                             | 165.5003                   | 5.9458                                             | 1.11107E-31                                  |
| 1354.9369                             | 4.5987                     | 0.4243                                             | 7.91256E-33                                  |
| 1360.4514                             | 2.4692                     | 8.3588                                             | 1.55005E-31                                  |
| 1381.5961                             | 66.0641                    | 0.6939                                             | 1.25952E-32                                  |
| 1383.0031                             | 61.3219                    | 0.5803                                             | 1.05183E-32                                  |
| 1402.4462                             | 3.8117                     | 5.3977                                             | 9.59515E-32                                  |
| 1475.0769                             | 0.1012                     | 16.4057                                            | 2.71642E-31                                  |
| 1489.0287                             | 19.3242                    | 0.3571                                             | 5.83434E-33                                  |
| 1491.0543                             | 19.6598                    | 0.2631                                             | 4.29026E-33                                  |
| 1503.611                              | 0.4633                     | 10.6489                                            | 1.71587E-31                                  |
| 3110.3152                             | 0.0595                     | 48.2199                                            | 2.32997E-31                                  |
| 3111.1652                             | 8.8674                     | 10.7206                                            | 5.17736E-32                                  |
| 3111.4257                             | 8.9296                     | 10.2619                                            | 4.95501E-32                                  |
| 3113.5628                             | 0.034                      | 315.3124                                           | 1.52043E-30                                  |
| 3165.7925                             | 0.0056                     | 0.3075                                             | 1.43443E-33                                  |
| 3166.4406                             | 0.008                      | 53.5772                                            | 2.49825E-31                                  |
| 3166.7205                             | 8E-4                       | 53.2554                                            | 2.4828E-31                                   |
| 3167.6296                             | 1.7063                     | 76.2679                                            | 3.55362E-31                                  |

**Table S2** HEXS harmonics calculated using DFT at the B3LYP level of theory

| HEXS Harmonics<br>(cm <sup>-1</sup> ) | IR Intensities<br>(Km/mol) | Raman scattering<br>activity (Å <sup>4</sup> /AMU) | Raman cross<br>section (cm <sup>2</sup> /sr) |
|---------------------------------------|----------------------------|----------------------------------------------------|----------------------------------------------|
| 100.374                               | 2.6712                     | 0.0742                                             | 6.63688E-32                                  |
| 103.7836                              | 2.6583                     | 0.0756                                             | 6.36875E-32                                  |
| 180.9225                              | 0.0025                     | 0.8406                                             | 2.70547E-31                                  |
| 185.3016                              | 4E-4                       | 0.8415                                             | 2.60292E-31                                  |
| 201.5754                              | 4E-4                       | 5.4816                                             | 1.47623E-30                                  |
| 205.4376                              | 1E-4                       | 0.0024                                             | 6.26637E-34                                  |
| 228.6387                              | 1E-3                       | 0.0029                                             | 6.37193E-34                                  |
| 254.5226                              | 4.0432                     | 4.2759                                             | 7.93051E-31                                  |
| 256.2532                              | 3.9979                     | 4.3792                                             | 8.03655E-31                                  |
| 290.5168                              | 0.0017                     | 0.0406                                             | 6.14014E-33                                  |
| 291.5442                              | 9E-4                       | 0.0319                                             | 4.79856E-33                                  |
| 325.9975                              | 1.5684                     | 0.6172                                             | 7.84973E-32                                  |
| 331.0761                              | 1.6649                     | 0.5026                                             | 6.24742E-32                                  |

|           |          |          |             |
|-----------|----------|----------|-------------|
| 339.0851  | 0.2627   | 2.188    | 2.62546E-31 |
| 340.9755  | 0.0599   | 2.4349   | 2.89792E-31 |
| 344.4342  | 3.8799   | 0.2018   | 2.36641E-32 |
| 383.152   | 0.0019   | 33.0757  | 3.32345E-30 |
| 416.005   | 0.0574   | 0.0219   | 1.95778E-33 |
| 426.8838  | 6.3837   | 1.0672   | 9.20067E-32 |
| 428.3722  | 5.682    | 1.0685   | 9.16709E-32 |
| 444.2823  | 0.0373   | 4.101    | 3.34398E-31 |
| 445.9756  | 0.0039   | 4.0167   | 3.25798E-31 |
| 465.5156  | 2.9306   | 0.0198   | 1.51359E-33 |
| 491.3903  | 63.8949  | 0.101    | 7.16979E-33 |
| 492.5495  | 65.4265  | 0.0857   | 6.06419E-33 |
| 507.2459  | 0.5938   | 9.2706   | 6.30329E-31 |
| 526.8033  | 0.0174   | 0.0036   | 2.32593E-34 |
| 546.9363  | 7E-4     | 14.3375  | 8.80918E-31 |
| 549.6584  | 0.0131   | 0.0135   | 8.23979E-34 |
| 550.164   | 0.0154   | 0.0549   | 3.34674E-33 |
| 559.9619  | 0.1849   | 1.7333   | 1.03206E-31 |
| 560.7614  | 0.1058   | 1.7213   | 1.02297E-31 |
| 669.0068  | 419.5948 | 7E-4     | 3.2985E-35  |
| 683.336   | 76.0436  | 0.5552   | 2.54508E-32 |
| 683.7536  | 76.8025  | 0.5376   | 2.46244E-32 |
| 689.3241  | 0.1705   | 0.1922   | 8.71133E-33 |
| 690.6973  | 0.4678   | 0.1908   | 8.62556E-33 |
| 848.224   | 18.5743  | 0.0097   | 3.36287E-34 |
| 857.1511  | 0.0204   | 14.1297  | 4.83285E-31 |
| 880.4808  | 0.0858   | 0.0992   | 3.27733E-33 |
| 881.7731  | 0.2257   | 0.1149   | 3.78883E-33 |
| 926.8427  | 287.1435 | 0.8006   | 2.47507E-32 |
| 927.4245  | 33.5772  | 8.6325   | 2.66658E-31 |
| 930.8755  | 339.8642 | 1.4567   | 4.47813E-32 |
| 931.8288  | 344.9703 | 1.2426   | 3.81489E-32 |
| 1008.9966 | 0.0682   | 3.2331   | 8.94967E-32 |
| 1010.3955 | 0.0792   | 3.2529   | 8.98819E-32 |
| 1013.0487 | 0.0034   | 0.1268   | 3.49166E-33 |
| 1014.5754 | 0.1395   | 0.1447   | 3.97673E-33 |
| 1060.4894 | 0.0283   | 3E-4     | 7.77989E-36 |
| 1079.6172 | 0.005    | 2E-4     | 5.06591E-36 |
| 1107.8685 | 315.6494 | 0.7101   | 1.73829E-32 |
| 1107.9452 | 314.6894 | 0.7082   | 1.73348E-32 |
| 1120.086  | 0.0219   | 50.3018  | 1.21359E-30 |
| 1183.3349 | 0.0684   | 1.1492   | 2.57675E-32 |
| 1183.8374 | 0.5577   | 1.1876   | 2.66134E-32 |
| 1203.4886 | 121.8274 | 0.218    | 4.77843E-33 |
| 1203.8781 | 121.1514 | 0.2217   | 4.85742E-33 |
| 1241.2508 | 1.2803   | 12.2046  | 2.56593E-31 |
| 1245.1354 | 88.8413  | 0.1843   | 3.8584E-33  |
| 1253.9587 | 0.0155   | 0.01     | 2.07359E-34 |
| 1259.3141 | 0.007    | 0.0085   | 1.75238E-34 |
| 1330.712  | 0.2105   | 0.0059   | 1.128E-34   |
| 1343.899  | 221.4555 | 8.811    | 1.24195E-35 |
| 1344.7004 | 221.2109 | 8.8767   | 1.67281E-31 |
| 1357.692  | 0.1704   | 0.0258   | 4.79781E-34 |
| 1363.3779 | 1.7612   | 3.1232   | 5.77443E-32 |
| 1364.5206 | 0.657    | 2.9821   | 5.50716E-32 |
| 1370.6027 | 2.0543   | 0.0098   | 1.79868E-34 |
| 1373.6582 | 95.5992  | 0.1194   | 2.18469E-33 |
| 1373.9304 | 93.6865  | 0.1664   | 3.04382E-33 |
| 1385.1527 | 0.086    | 3.122    | 5.6466E-32  |
| 1385.9427 | 0.4736   | 3.179    | 5.74513E-32 |
| 1402.9774 | 57.1826  | 0.0035   | 6.21844E-35 |
| 1403.4442 | 54.8444  | 0.0071   | 1.26087E-34 |
| 1480.6437 | 0.6128   | 13.6459  | 2.24743E-31 |
| 1483.05   | 0.9473   | 13.6205  | 2.23808E-31 |
| 1489.2016 | 20.8376  | 7.7072   | 1.259E-31   |
| 1492.5594 | 26.1729  | 6.666    | 1.08544E-31 |
| 1497.9159 | 45.8596  | 1.3128   | 2.12679E-32 |
| 1505.4083 | 1.338    | 4.6178   | 7.42805E-32 |
| 3043.3076 | 2.404    | 16.7468  | 8.44628E-32 |
| 3043.7474 | 1.8115   | 23.2656  | 1.17307E-31 |
| 3043.8321 | 3.679    | 3.8592   | 1.94574E-32 |
| 3043.9146 | 0.0204   | 42.1437  | 2.1247E-31  |
| 3048.0474 | 112.3396 | 4.1298   | 2.07654E-32 |
| 3048.7168 | 0.5302   | 886.0017 | 4.45307E-30 |
| 3163.9241 | 0.1474   | 1.0043   | 4.6904E-33  |
| 3164.7305 | 1.019    | 1.5321   | 7.15175E-33 |
| 3166.7467 | 2.4451   | 3.0265   | 1.41095E-32 |
| 3167.3812 | 6.3755   | 15.3814  | 7.16792E-32 |
| 3167.9832 | 4.4753   | 31.3919  | 1.46234E-31 |
| 3169.3997 | 1.2835   | 70.7782  | 3.29414E-31 |
